# Supplementary material
Source: publisher site journal article supplement (https://www.dovepress.com/article/399292)
Supplement: Supplementary file 1 [file get_supplementary_file.php]

| **Appendix A** Measurement items of studied variables with factor loadings | |
| --- | --- |
| Items of measured variables | Standardized Loadings |
| ***High Involvement Work Practices (HIWP), CR= .92 (Time 1).*** |  |
| Specific goals are established for my job. | 0.670 |
| My career progression is dependent on my performance relative to expected goals. | 0.681 |
| I am consulted before decisions related to my work situation are reached. | 0.788 |
| Employees are able to achieve a work/life balance. | 0.755 |
| Adequate training is provided to ensure that employees are competent in their role. | 0.814 |
| Appropriate levels of job security are offered to employees. | 0.740 |
| There is an effort to locate opportunities for employees to apply their expanding knowledge and abilities. | 0.750 |
| Employees are consulted about issues important to them. | 0.749 |
| Employees can openly voice their opinions and concerns without fear of retribution. | 0.711 |
| ***Employees’ Commitment (EC), CR= .91 (Time 2).*** |  |
| In general, the work I am given to do at my organization is challenging and exciting | 0.768 |
| This organization always makes clear what is expected of me | 0.794 |
| The top management people in my organization pay attention to ideas brought to them by other employees | 0.830 |
| I feel I can trust this organization to do what it says it will do | 0.816 |
| In this organization you are encouraged to feel that the work you do makes important contributions to the larger aims of the organization | 0.800 |
| In my organization, I am allowed to participate in decisions regarding my workload and performance standards | 0.803 |
| ***Supervisors’ Deviant Behavior (SDB), CR= .94 (Time 2).*** |  |
| My supervisor makes negative comments about me to others | 0.825 |
| My supervisor gives me the silent treatment | 0.851 |
| My supervisor expresses anger at me when he/she is mad for another reason | 0.859 |
| My supervisor is rude to me | 0.891 |
| My supervisor breaks promise he/she makes | 0.913 |
| My supervisor puts me down in front of others | 0.788 |
| ***Public Service Motivation (PSM), CR= .91 (Time 2).*** |  |
| Meaningful public service is important to me. | 0.817 |
| I am often reminded by daily events how dependent we are on one another. | 0.815 |
| Making a difference in society means more to me than personal achievements. | 0.851 |
| I am prepared to make sacrifices for the good of society. | 0.790 |
| I am not afraid to go to bat for the rights of others even if it means I will be ridiculed. | 0.822 |
| ***Employees’ Proactive behavior (EPB), CR= .87 (Time 3).*** |  |
| Implementing ideas for improvements oneself | 0.602 |
| Suggesting ideas for improvements to colleagues | 0.676 |
| Suggesting ideas for improvements to manager, supervisor, or others | 0.701 |
| Trying to figure out why reject levels are increasing | 0.701 |
| Making suggestions to relevant people as to why reject levels are high | 0.609 |
| Informing the supplier about the problem | 0.698 |
| Trying to sort out the problem so it will not happen again | 0.709 |
| Trying to find out why the wire/rods are of poor quality | 0.670 |
| ***Note:*** CR = Composite Reliability; Factor loadings are significant at the significance level of .001 | |
